# Supplementary material for: Silica capsules enclosing P123 triblock copolymer micelles for flurbiprofen storage and release
Source: Royal Society of Chemistry journal article supplement (doi:10.1039/c5tb00058k), 2015-01-01
Supplement: c5tb00058k1.pdf [file c5tb00058k1.pdf]

## Silica Capsules Enclosing P123 Triblock Copolymer Micelles for Flurbiprofen Storage and Release

Stef Kerkhofs,<sup>a</sup> Fadila Saïdi,<sup>b</sup> Niels Vandervoort,<sup>a</sup> Guy Van den Mooter,<sup>c</sup> Charlotte Martineau,<sup>b</sup> Francis Taulelle,<sup>a,b</sup> and Johan A. Martens<sup>a\*</sup>

<sup>a</sup> Centre for Surface Chemistry and Catalysis, KU Leuven, Heverlee, Belgium. E-mail: Johan.Martens@biw.kuleuven.be

<sup>b</sup> Tectospin, Institut Lavoisier, Université de Versailles St Quentin en Yvelines, France

<sup>c</sup> Drug Delivery and Disposition, KU Leuven, Leuven, Belgium

### Supplementary Information

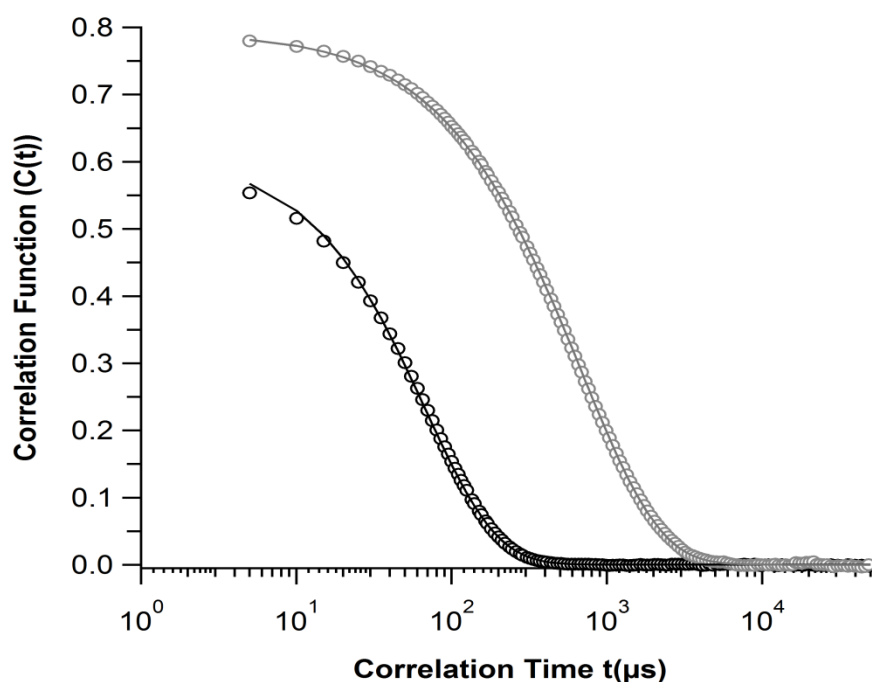

Figure S1. Autocorrelation data from DLS measurement of 3.7 wt% P123 solution in citrate buffered solution. Before flurbiprofen addition (black), and after 0.6 wt% flurbiprofen addition (grey). Experimental data ( $\circ$ ) is modeled using the Maximum Entropy Method (solid line). Decay times were converted with the Stokes-Einstein law to hydrodynamic radii, yielding intensity weighted size distributions.

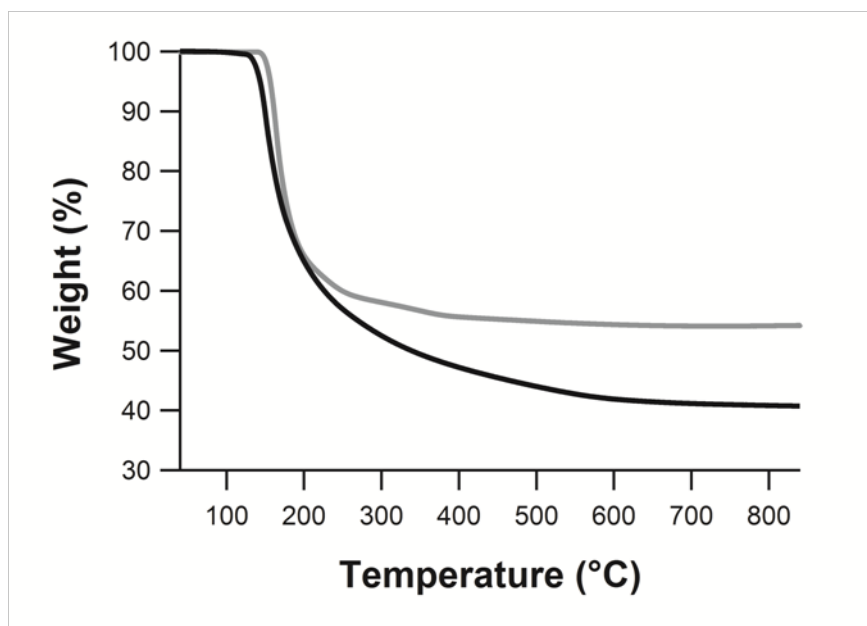

Fig. S2. Thermal gravimetrical analysis of flurbiprofen-P123-silica (FPS) capsule (black) and not loaded COK-12 (grey).

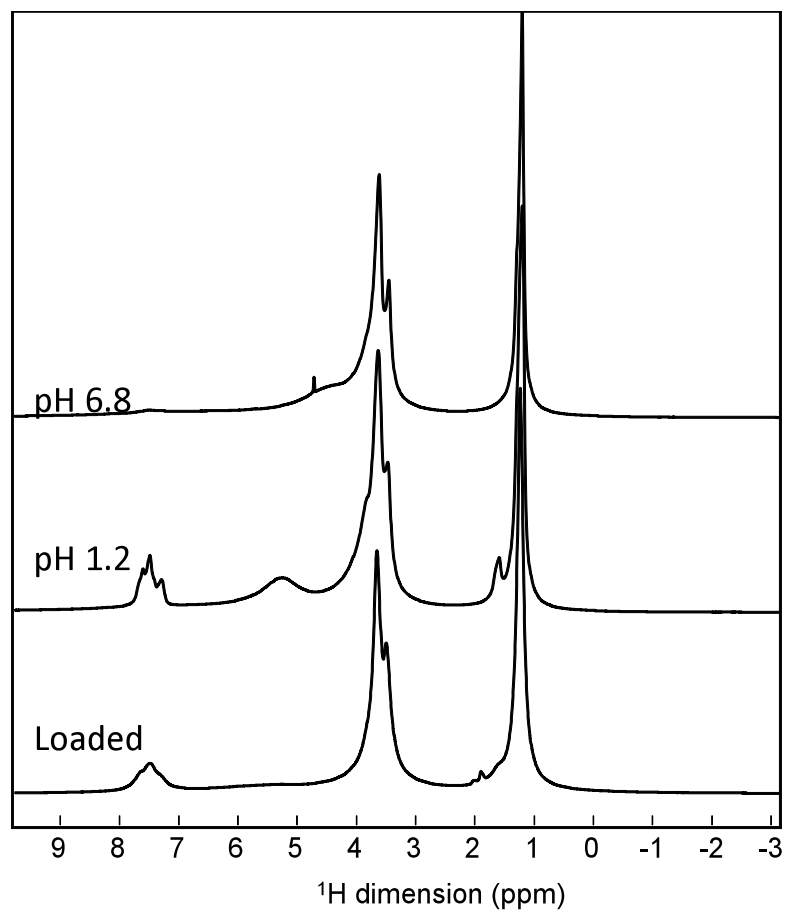

Figure S3.  $^{13}\text{C}$  single-pulse MAS NMR spectra of FPS initial sample (loaded), and of the sample after release experiments in solutions of pH 1.2 and 6.8.

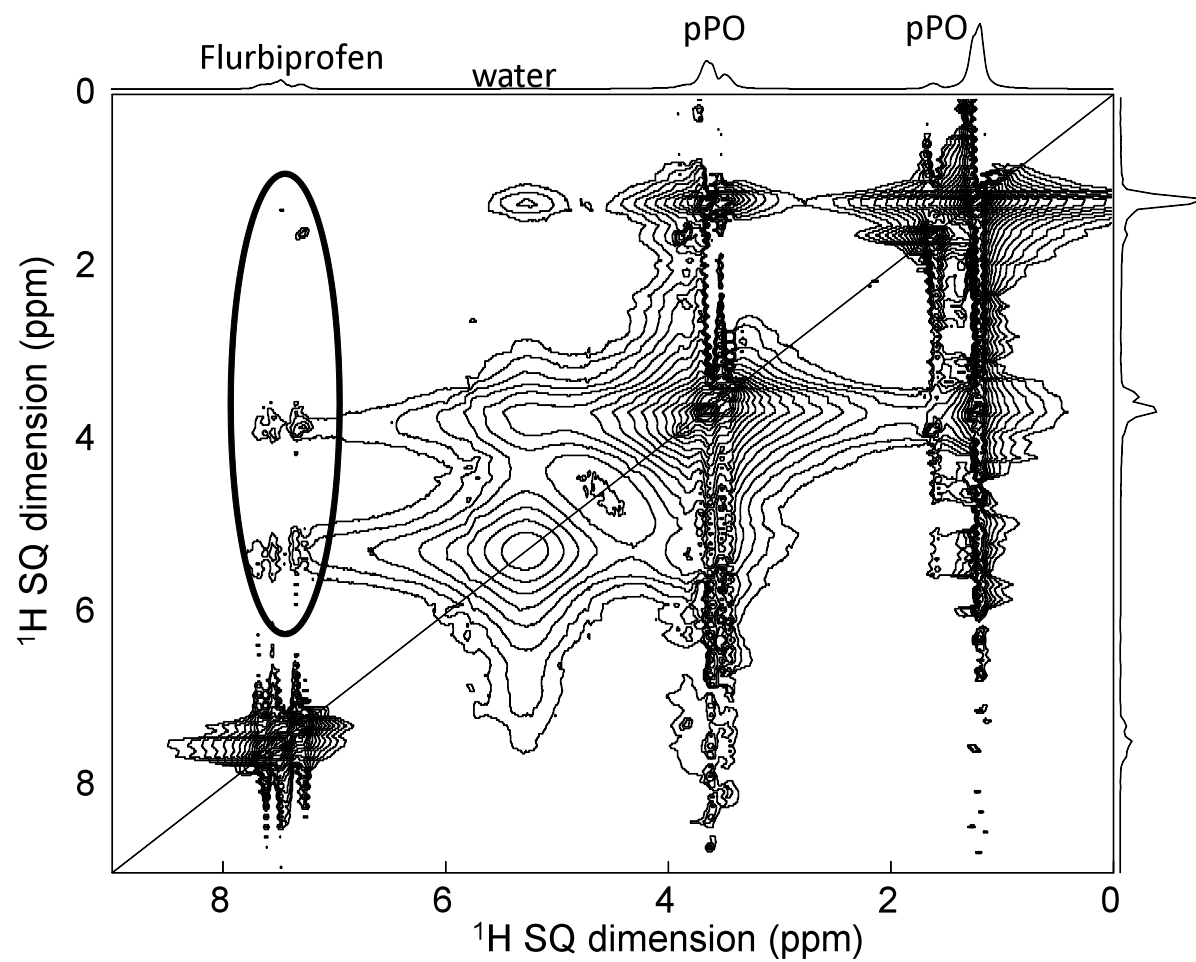

Fig. S4.  $^1\text{H}$ - $^1\text{H}$  2D MAS NMR spectrum of FPS sample after release experiment in pH 1.2.

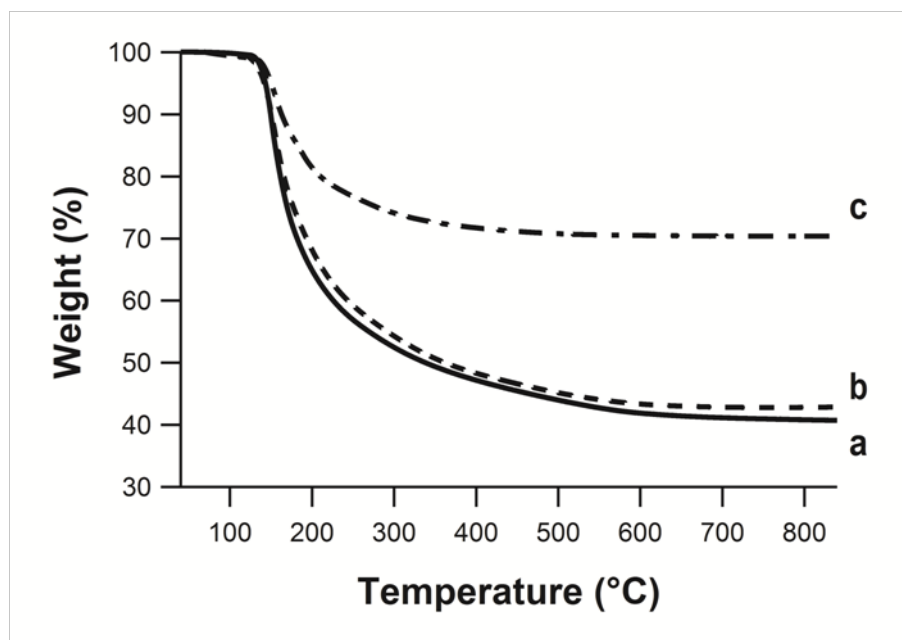

Fig. S5. thermal gravimetric analysis of (a) parent FPS material and after 4 h release in (b) simulated gastric fluid (0.1 M, pH 1.2) or (c) phosphate buffer (0.1 M, pH 6.8) at 120mg flurbiprofen l<sup>-1</sup> dosage.
